# Supplementary material
Source: Springer Nature journal article supplement (https://www.springerprofessional.de/resource/supplementary/13673_2011_13_MOESM5_ESM.pdf/11899344)

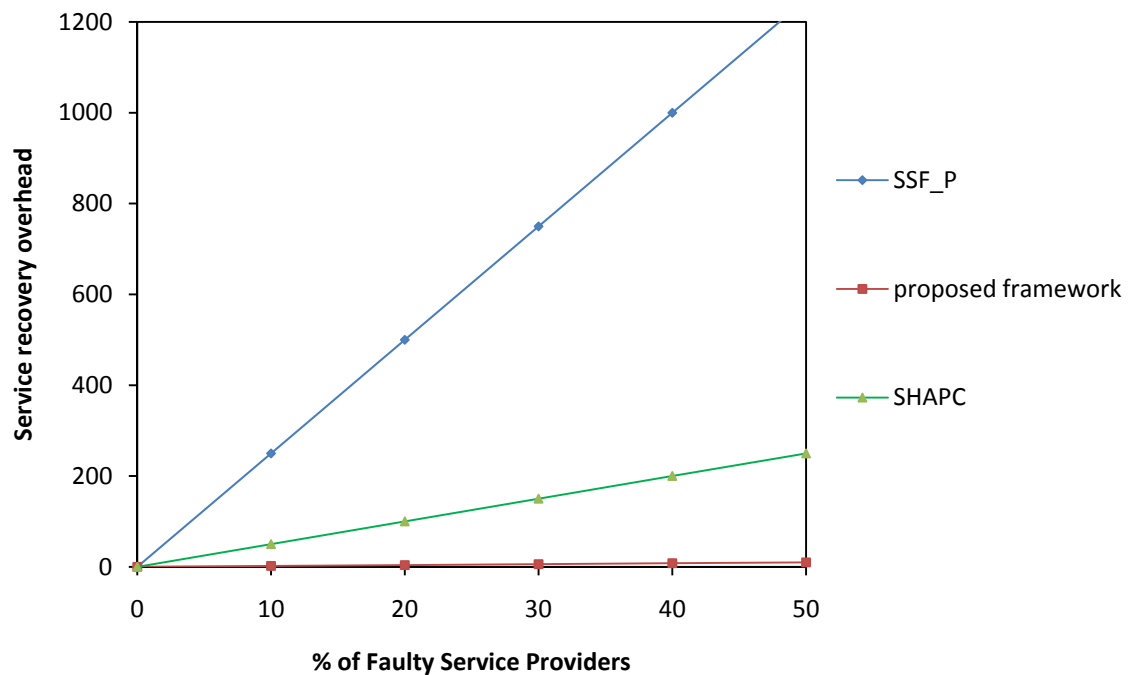

Supplement: MOESM5 [file 11899344]
